# Supplementary material for: Metal-free SERS substrate based on rGO–TiO2–Fe3O4 nanohybrid: contribution from interfacial charge transfer and magnetic controllability
Source: Royal Society of Chemistry journal article supplement (doi:10.1039/c9cp02160d), 2019-01-01
Supplement: c9cp02160d1.pdf [file c9cp02160d1.pdf]

## Supplementary information

### **Metal-free SERS substrate based on rGO-TiO<sub>2</sub>-Fe<sub>3</sub>O<sub>4</sub> nanohybrid: Contribution from interfacial charge transfer and magnetic controllability**

Xin Jiang,<sup>‡a</sup> Qinqin Sang,<sup>‡a</sup> Ming Yang,<sup>a</sup> Juan Du,<sup>a</sup> Weie Wang,<sup>a</sup> Libin  
Yang,<sup>\*a</sup> Xiaoxia Han<sup>b</sup> and Bing Zhao<sup>\*b</sup>

<sup>a</sup>College of Pharmacy, Jiamusi University, Jiamusi 154007, People's Republic of  
China

<sup>b</sup>State Key Laboratory of Supramolecular Structure and Materials, Jilin University,  
Changchun 130012, People's Republic of China

\*Corresponding authors. E-mail: ylb76@163.com (L.B. Y.); zhaob@mail.jlu.edu.cn  
(B. Z.)

<sup>‡</sup>These authors contributed equally to this work.

The enhancement factor (EF) of rGO-TiO<sub>2</sub>-Fe<sub>3</sub>O<sub>4</sub> substrate is calculated according to the following equation:

$$EF = (I_{\text{SERS}}/I_{\text{NR}}) \times (N_{\text{NR}}/N_{\text{SERS}}) = (I_{\text{SERS}}/I_{\text{NR}}) \times [(S_{\text{laser}} \times h \times C_{\text{NR}} \times N_{\text{A}}) / (S_{\text{laser}}/S_{\text{MBA}})]$$

in which the  $I_{\text{SERS}}$  and  $I_{\text{NR}}$  represent the SERS ( $1 \times 10^{-6}$  mol/L of 4-MBA adsorbed on rGO-TiO<sub>2</sub>-Fe<sub>3</sub>O<sub>4</sub> substrate) and normal Raman (0.1 mol/L of 4-MBA ethanol solution) intensities at 1594 cm<sup>-1</sup> respectively, and here the ratio of  $I_{\text{SERS}}/I_{\text{NR}}$  is about 37.7. The  $N_{\text{NR}}$  and  $N_{\text{SERS}}$  represent the numbers of 4-MBA molecules in 0.1 mol/L of solution sample and on rGO-TiO<sub>2</sub>-Fe<sub>3</sub>O<sub>4</sub> substrate adsorbed from  $1 \times 10^{-6}$  mol/L of solution, which are lying in the laser spot. The  $S_{\text{laser}}$  is the area of laser focused on the sample (the diameter of laser spot is 1 μm), and  $h$  is the effective depth of laser (17.88 μm). The  $C_{\text{NR}}$  is the concentration of 4-MBA used in normal Raman spectrum (0.1 mol/L).  $S_{\text{MBA}}$  is the area of 4-MBA molecule ( $6.9 \times 10^{-13}$  m<sup>2</sup>) and  $N_{\text{A}}$  is the Avogadro constant. Therefore, the EF of rGO-TiO<sub>2</sub>-Fe<sub>3</sub>O<sub>4</sub> substrate is estimated to be about  $2.7 \times 10^7$ .

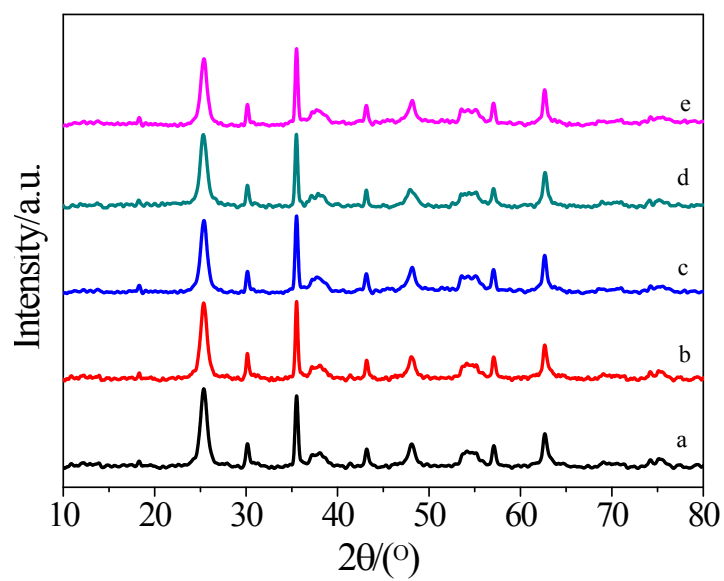

**Fig. S1** XRD patterns of rGO-TiO<sub>2</sub>-Fe<sub>3</sub>O<sub>4</sub> samples with different addition amount of FeSO<sub>4</sub> (a: Ti/Fe=1/5, b: Ti/Fe=1/10, c: Ti/Fe=1/15, d: Ti/Fe=1/20, e: Ti/Fe=1/25).

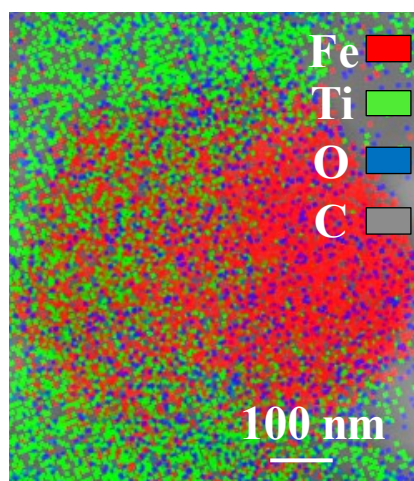

**Fig. S2** The merged Fe, Ti, O and C elemental mapping image of single rGO-TiO<sub>2</sub>-Fe<sub>3</sub>O<sub>4</sub> nanohybrid.

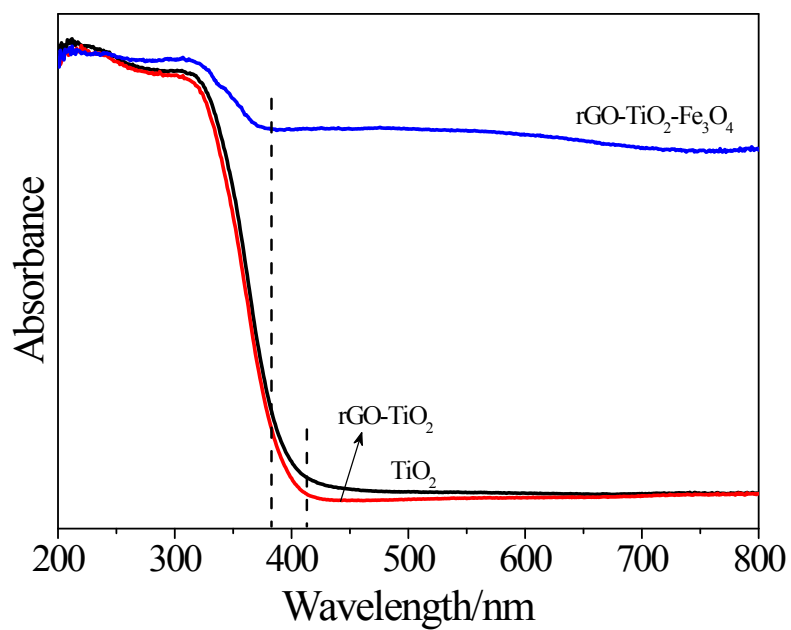

**Fig. S3** UV-vis DRS spectra of TiO<sub>2</sub>, rGO-TiO<sub>2</sub> and rGO-TiO<sub>2</sub>-Fe<sub>3</sub>O<sub>4</sub> samples.

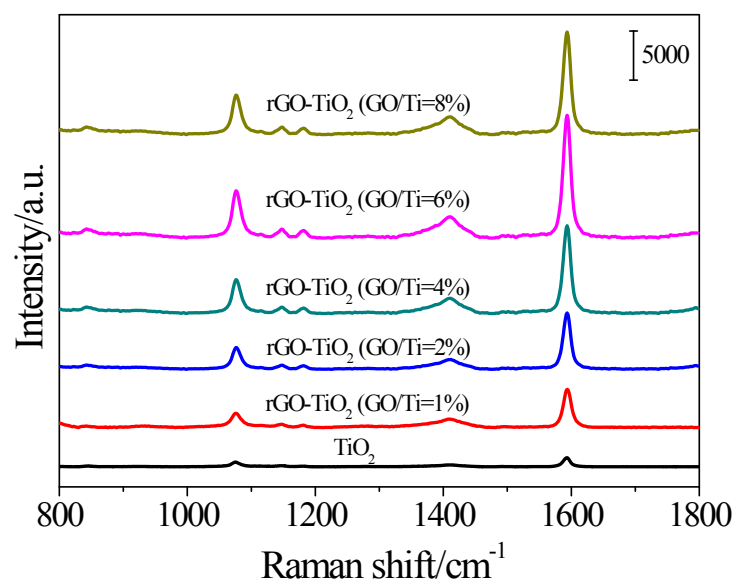

**Fig. S4** SERS spectra of 4-MBA adsorbed on TiO<sub>2</sub> and different rGO-TiO<sub>2</sub> substrates.

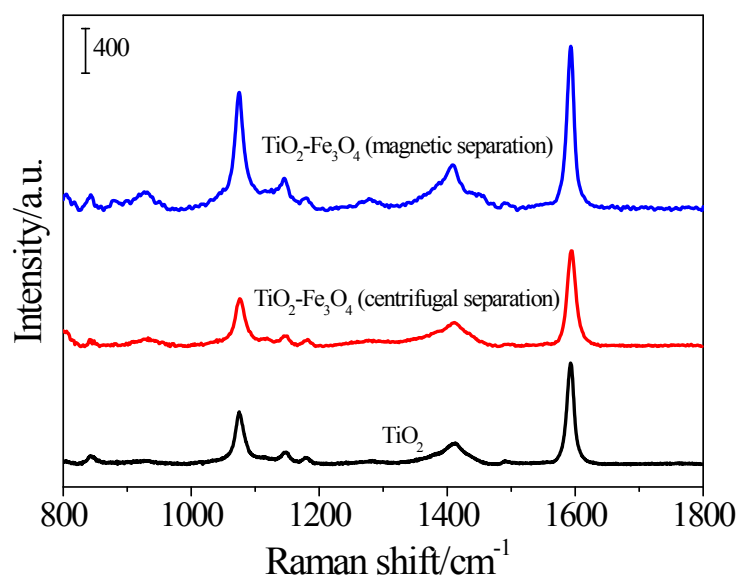

**Fig. S5** SERS spectra of 4-MBA adsorbed on TiO<sub>2</sub> and TiO<sub>2</sub>-Fe<sub>3</sub>O<sub>4</sub> with the centrifugal separation treatment and magnetic separation treatment.

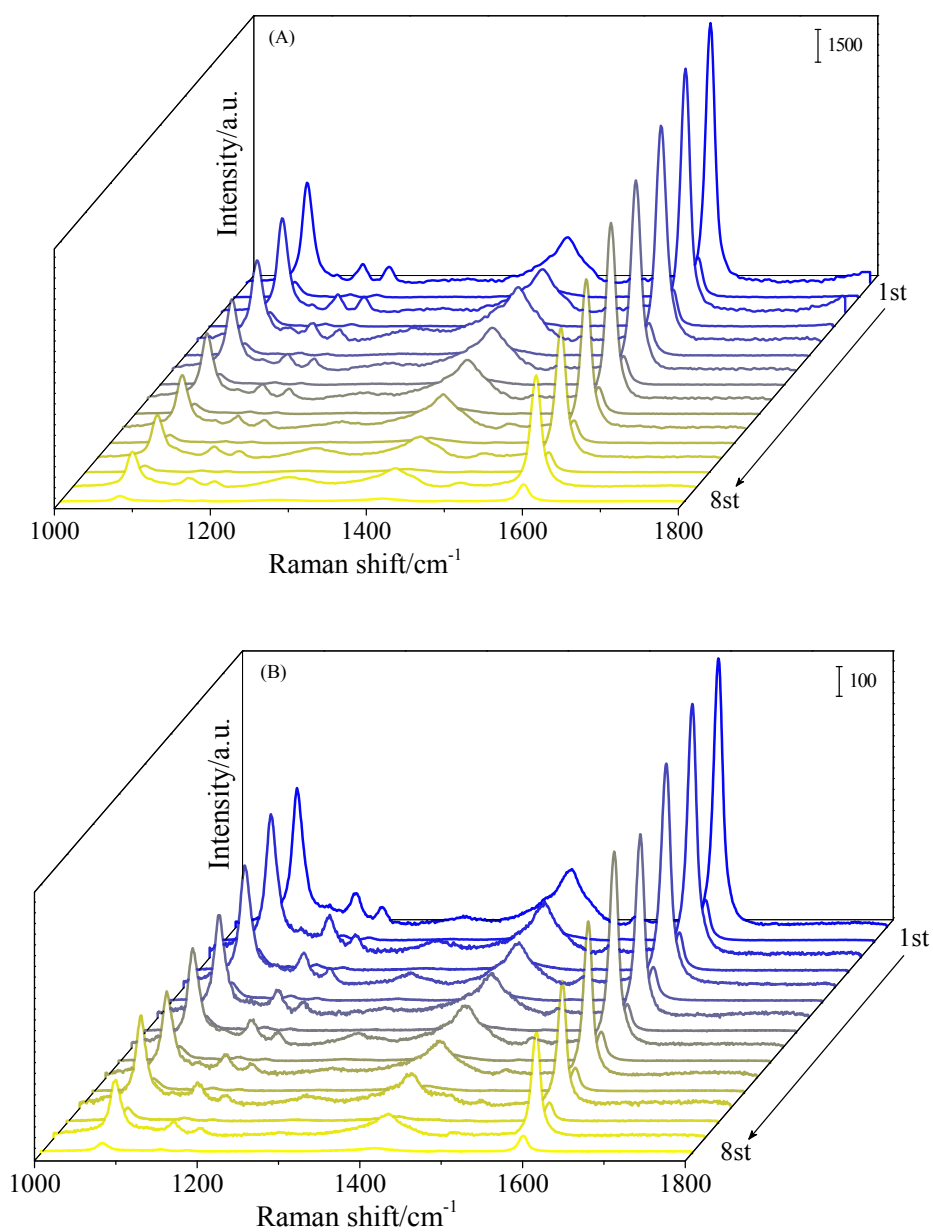

**Fig. S6** SERS spectra of 4-MBA adsorbed on the recycled rGO-TiO<sub>2</sub> (A) and TiO<sub>2</sub> (B) substrates (eight adsorption/UV-cleaning cycles).



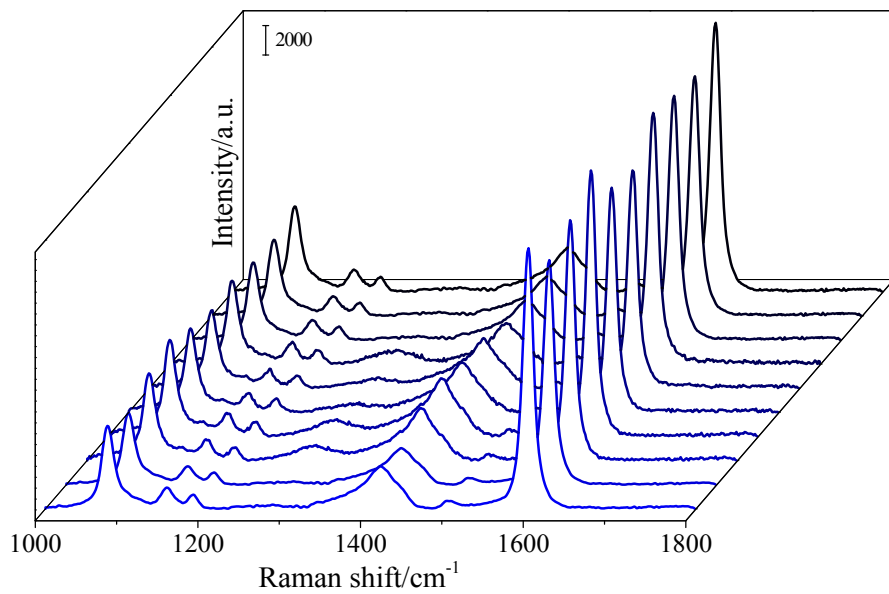

**Fig. S7** SERS spectra of 4-MBA adsorbed on ten identical rGO-TiO<sub>2</sub>-Fe<sub>3</sub>O<sub>4</sub> substrates with the centrifugal separation treatment.

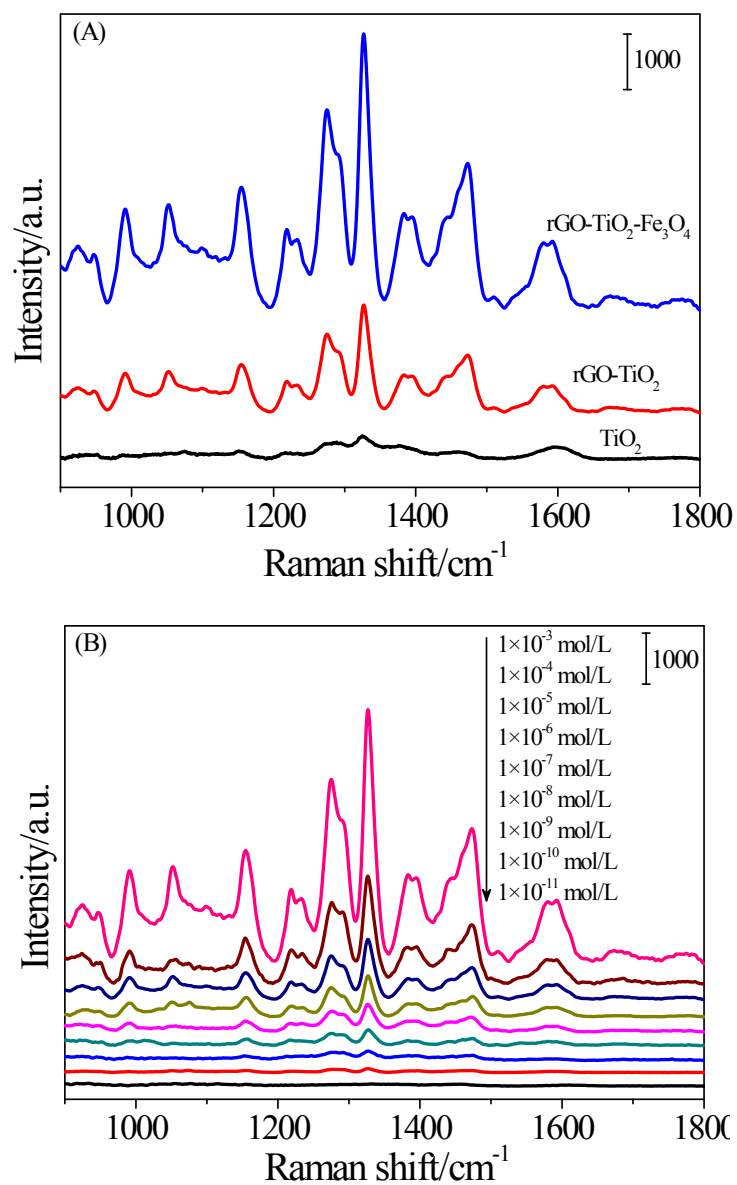

**Fig. S8** SERS spectra of 6-MP adsorbed on TiO<sub>2</sub>, rGO-TiO<sub>2</sub> and rGO-TiO<sub>2</sub>-Fe<sub>3</sub>O<sub>4</sub> substrates from 1 × 10<sup>-3</sup> mol/L solution (A); SERS spectra of 6-MP adsorbed on rGO-TiO<sub>2</sub>-Fe<sub>3</sub>O<sub>4</sub> substrates from different concentrations of 6-MP solution (B).

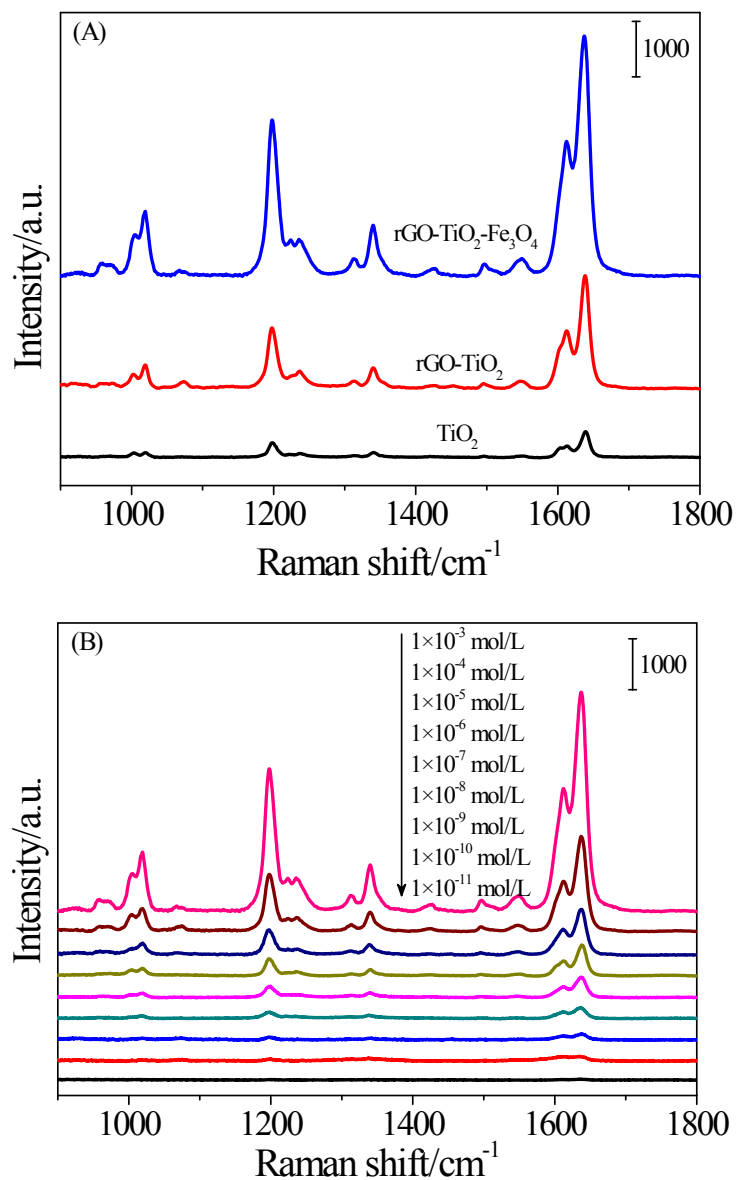

**Fig. S9** SERS spectra of BPE adsorbed on  $\text{TiO}_2$ ,  $\text{rGO-TiO}_2$  and  $\text{rGO-TiO}_2\text{-Fe}_3\text{O}_4$  substrates from  $1 \times 10^{-3}$  mol/L solution (A); SERS spectra of BPE adsorbed on  $\text{rGO-TiO}_2\text{-Fe}_3\text{O}_4$  substrates from different concentrations of BPE solution (B).

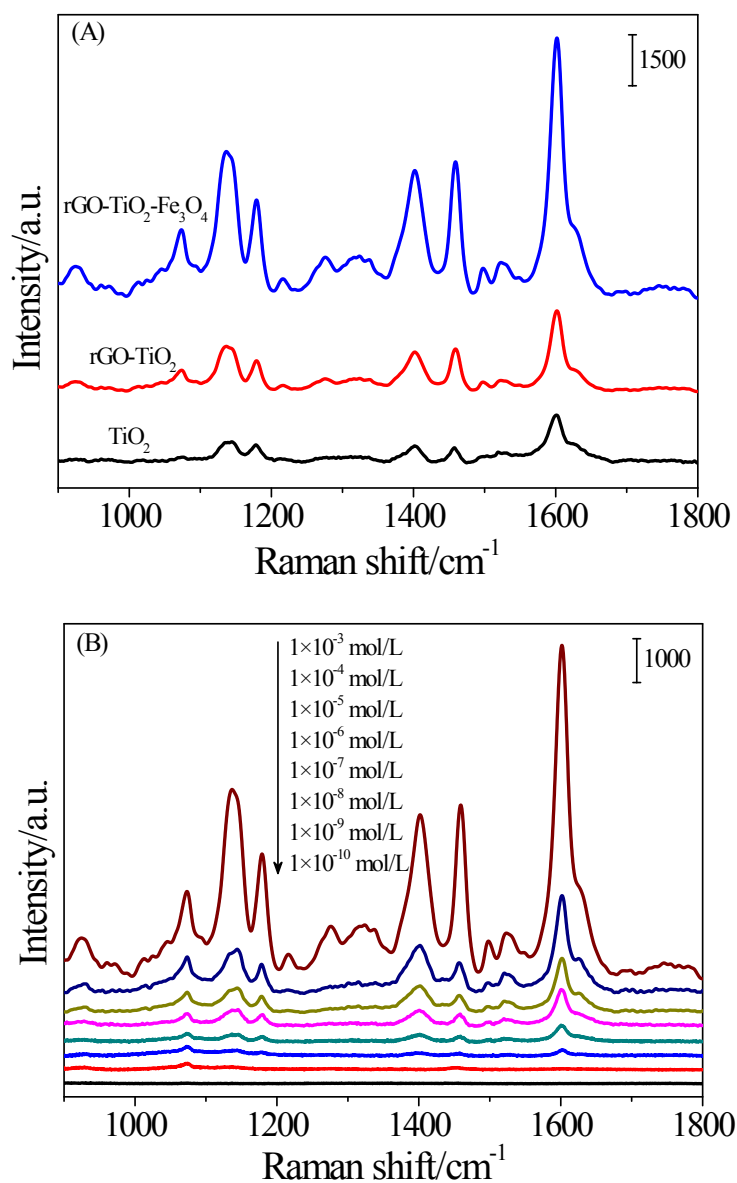

**Fig. S10** SERS spectra of PABA adsorbed on TiO<sub>2</sub>, rGO-TiO<sub>2</sub> and rGO-TiO<sub>2</sub>-Fe<sub>3</sub>O<sub>4</sub> substrates from  $1 \times 10^{-3}$  mol/L solution (A); SERS spectra of PABA adsorbed on rGO-TiO<sub>2</sub>-Fe<sub>3</sub>O<sub>4</sub> substrates from different concentrations of PABA solution (B).
